# Supplementary material for: Assessment of movement quality in robot- assisted upper limb rehabilitation after stroke: a review
Source: PubMed Central journal article supplement (PMC4180322; doi:10.1186/1743-0003-11-137), 2014-09-12
Supplement: 12984_2014_657_MOESM1_ESM.pdf [file 12984_2014_657_MOESM1_ESM.pdf]

| First Author, Year published | Subjects (n) | Phase                            | Rehabilitation Robot | Evaluation activity                     | Loss of somatosensation (feed-forward) |                         | Paresis & Loss of somatosensation (feedback) |          | Loss of fractionated movement |                     |                         | Abnormal muscle tone |      |                         |                           |                                                             |      |
|------------------------------|--------------|----------------------------------|----------------------|-----------------------------------------|----------------------------------------|-------------------------|----------------------------------------------|----------|-------------------------------|---------------------|-------------------------|----------------------|------|-------------------------|---------------------------|-------------------------------------------------------------|------|
|                              |              |                                  |                      |                                         | Plan                                   | Inter-limb coordination | Temporal efficiency                          | Accuracy | Efficacy                      | Movement Efficiency | Intra-limb coordination | Range (ROM)          | Ease | Smoothness              |                           |                                                             |      |
|                              |              |                                  |                      |                                         |                                        |                         |                                              |          |                               |                     |                         |                      |      | $\dot{x}, \dot{\theta}$ | $\ddot{x}, \ddot{\theta}$ | $\overset{\cdot}{\ddot{x}}, \overset{\cdot}{\ddot{\theta}}$ | -sub |
| Reinkensmeyer [128] 2000     | 3            | Chronic                          | ARM-Guide            | Multi-level PTP                         | ③                                      |                         |                                              |          |                               |                     |                         | ③                    |      |                         |                           |                                                             |      |
| Burgar [129] 2000            | 21           | Chronic                          | MIME                 | • Shape tracing<br>• Multi-level PTP    |                                        |                         |                                              |          |                               | ③                   |                         |                      |      |                         |                           |                                                             |      |
| Kahn [62] 2001               | 14           | Chronic                          | ARM-Guide            | Multi-level PTP                         |                                        |                         | ③                                            | ③        |                               |                     |                         | ③                    |      |                         |                           | ③                                                           |      |
| Rohrer [1] 2002              | 31           | Acute (n=12)<br>Chronic (n=19)   | MIT-Manus            | CO-PTP                                  |                                        |                         | ①<br>③                                       |          |                               |                     |                         |                      |      | ①                       | ① ①                       |                                                             | ③    |
| Lum [83] 2002                | 27           | Chronic                          | MIME                 | Targeted Reaching                       |                                        |                         |                                              |          |                               |                     |                         |                      | ③*   |                         |                           |                                                             |      |
| Lum [63] 2004                | 13           | Chronic                          | MIME                 | Multi-level PTP                         |                                        |                         | ③                                            |          |                               |                     |                         |                      |      |                         |                           |                                                             |      |
| Daly [71] 2005               | 12           | Chronic                          | InMotion2            | CO-PTP                                  |                                        |                         |                                              | ③        |                               |                     |                         |                      |      |                         |                           |                                                             | ③    |
| Toth [85] 2005               | 8            | Sub-acute (n=2)<br>Chronic (n=6) | REHAROB              | Therapist guided full ROM slow movement |                                        |                         |                                              |          |                               |                     |                         |                      |      | ② ③                     |                           |                                                             |      |
| Colombo [68] 2005            | 16           | Chronic                          | MEMOS                | Shape tracing                           |                                        |                         |                                              | ③        | ③<br>③ ③                      |                     |                         |                      |      | ③                       |                           |                                                             |      |
| Kahn [14] 2006               | 19           | Chronic                          | ARM-Guide            | Multi-level PTP                         |                                        |                         |                                              | ③        |                               |                     |                         |                      |      | ③ ③                     | ③ ③                       | ③                                                           |      |
| Lum [84] 2006                | 27           | Sub-acute                        | MIME                 | Multi-level PTP                         |                                        |                         |                                              |          |                               |                     |                         |                      |      | ③                       |                           |                                                             |      |
| Colombo [27] 2006            | 19           | Chronic                          | MEMOS                | Shape tracing                           |                                        |                         |                                              | ③        | ③<br>③ ③                      | ③                   |                         |                      |      | ③                       |                           |                                                             |      |

$\dot{x}, \dot{\theta}$  : Speed metric       $\ddot{x}, \ddot{\theta}$  : Acceleration metric       $\overset{\cdot}{\ddot{x}}, \overset{\cdot}{\ddot{\theta}}$  : Jerk metric      -sub: sub-movement metric  
**①** significant improvement in acute patients (P<0.05)      **②** significant improvement in sub-acute patients (P<0.05)      **③** significant improvement in chronic patients (P<0.05)  
**①** insignificant improvement in acute patients (P>0.05)      **②** insignificant improvement in sub-acute patients (P>0.05)      **③** insignificant improvement in chronic patients (P>0.05)

All the indicator has asterisk (\*) if the parameter used is reported to have strong correlation to any standard clinical scales.

Multiple symbols of different type in one category indicates different stages evaluated, multiple symbols of the same type in the same category indicates more than 1 parameter used to define the characteristic

| First Author, Year published | Subjects (n) | Phase                             | Rehabilitation Robot | Evaluation activity                                    | Loss of somatosensation (feed-forward) |                         | Paresis & Loss of somatosensation (feedback) |          | Loss of fractionated movement |                     |                         | Abnormal muscle tone |      |                         |                           |                                             |
|------------------------------|--------------|-----------------------------------|----------------------|--------------------------------------------------------|----------------------------------------|-------------------------|----------------------------------------------|----------|-------------------------------|---------------------|-------------------------|----------------------|------|-------------------------|---------------------------|---------------------------------------------|
|                              |              |                                   |                      |                                                        | Plan                                   | Inter-limb coordination | Temporal efficiency                          | Accuracy | Efficacy                      | Movement Efficiency | Intra-limb coordination | Range (ROM)          | Ease | Smoothness              |                           |                                             |
|                              |              |                                   |                      |                                                        |                                        |                         |                                              |          |                               |                     |                         |                      |      | $\dot{x}, \dot{\theta}$ | $\ddot{x}, \ddot{\theta}$ | $\overset{\sim}{x}, \overset{\sim}{\theta}$ |
| Sanchez [74] 2006            | 5            | Chronic                           | T-WREX               | • Free reaching<br>• PTP                               |                                        |                         | ③ ③                                          | ③        |                               |                     |                         | ③ ③                  |      |                         |                           |                                             |
| Dipietro [39] 2007           | 117          | Chronic                           | MIT-Manus InMotion2  | Circle drawing                                         |                                        |                         | ③*<br>③*                                     |          |                               |                     | ③*                      |                      |      |                         |                           |                                             |
| Chang [55] 2007              | 20           | Chronic                           | BFIAMT               | Reach and touch                                        | ③<br>③                                 |                         | ③                                            |          |                               |                     |                         |                      |      |                         |                           | ③                                           |
| Fazekas [87] 2007            | 15           | Chronic                           | REHAROB              | Therapist guided full ROM slow movement                |                                        |                         |                                              |          |                               |                     |                         |                      | ③ ③  |                         |                           |                                             |
| Beer [77] 2008               | 5            | Chronic                           | MACARM               | Multi-level PTP                                        |                                        |                         |                                              |          |                               |                     | ③<br>③                  |                      |      |                         |                           |                                             |
| Colombo [13] 2008            | 22           | Sub-acute (n=9)<br>Chronic (n=13) | MEMOS                | Shape tracing                                          |                                        |                         |                                              | ② ③      | ② ③                           | ② ③                 |                         |                      |      | ② ③                     | ② ③                       | ②<br>③                                      |
| Iwamura [54] 2008            | 10           | Chronic                           | T-WREX               | Multi-level PTP                                        | ③                                      |                         |                                              |          |                               |                     |                         | ③                    |      |                         |                           | ③                                           |
| Sanguineti [56] 2009         | 9            | Chronic                           | BdF                  | Outward PTP reaching                                   |                                        |                         |                                              |          |                               |                     |                         |                      |      |                         |                           | ③                                           |
|                              | 10           | Chronic                           | BdF                  | Tracking                                               |                                        |                         |                                              |          |                               |                     |                         |                      | ③    |                         |                           |                                             |
| Squeri [75] 2009             | 4            | Chronic                           | BdF                  | Bimanual forward/backward reaching                     |                                        |                         |                                              |          |                               |                     |                         |                      |      |                         |                           | ③                                           |
|                              |              |                                   |                      | Bimanual forward/backward reaching                     |                                        |                         |                                              |          |                               |                     |                         |                      |      |                         |                           |                                             |
| Nef [44] 2009                | 3            | Chronic                           | ARMin                | • Passive mobilization<br>• Active virtual catch & hit |                                        |                         |                                              |          |                               |                     |                         |                      |      |                         |                           | ③<br>③ ③                                    |

$\dot{x}, \dot{\theta}$  : Speed metric

$\ddot{x}, \ddot{\theta}$  : Acceleration metric

$\overset{\sim}{x}, \overset{\sim}{\theta}$  : Jerk metric -sub: sub-movement metric

① significant improvement in acute patients (P<0.05)

② significant improvement in sub-acute patients (P<0.05)

③ significant improvement in chronic patients (P<0.05)

① insignificant improvement in acute patients (P>0.05)

② insignificant improvement in sub-acute patients (P>0.05)

③ insignificant improvement in chronic patients (P>0.05)

All the indicator has asterisk (\*) if the parameter used is reported to have strong correlation to any standard clinical scales.

Multiple symbols of different type in one category indicates different stages evaluated, multiple symbols of the same type in the same category indicates more than 1 parameter used to define the characteristic

| First Author, Year published | Subjects (n) | Phase     | Rehabilitation Robot                   | Evaluation activity                    | Loss of somatosensation (feed-forward) |                         | Paresis & Loss of somatosensation (feedback) |          | Loss of fractionated movement |                     |                         | Abnormal muscle tone |      |                         |                           |                                                             |          |  |  |
|------------------------------|--------------|-----------|----------------------------------------|----------------------------------------|----------------------------------------|-------------------------|----------------------------------------------|----------|-------------------------------|---------------------|-------------------------|----------------------|------|-------------------------|---------------------------|-------------------------------------------------------------|----------|--|--|
|                              |              |           |                                        |                                        | Plan                                   | Inter-limb coordination | Temporal efficiency                          | Accuracy | Efficacy                      | Movement Efficiency | Intra-limb coordination | Range (ROM)          | Ease | Smoothness              |                           |                                                             |          |  |  |
|                              |              |           |                                        |                                        |                                        |                         |                                              |          |                               |                     |                         |                      |      | $\dot{x}, \dot{\theta}$ | $\ddot{x}, \ddot{\theta}$ | $\overset{\cdot}{\ddot{x}}, \overset{\cdot}{\ddot{\theta}}$ | -sub     |  |  |
| Lewis [29] 2009              | 15           | Chronic   | Haptic MASTER                          | Voluntary constrained reaching         | ③                                      |                         | ③                                            |          |                               |                     |                         | ③                    |      | ③                       |                           |                                                             |          |  |  |
|                              |              |           |                                        | Voluntary free reaching                | ③                                      |                         | ③                                            |          |                               |                     | ③                       |                      | ③    |                         |                           |                                                             |          |  |  |
|                              |              |           |                                        | Assisted constrained reaching          | ③                                      |                         | ③                                            |          |                               |                     | ③                       |                      | ③    |                         |                           |                                                             |          |  |  |
|                              |              |           |                                        | Assisted free reaching                 | ③                                      |                         | ③                                            |          |                               |                     | ③                       |                      | ③    |                         |                           |                                                             |          |  |  |
| Vergaro [69] 2010            | 10           | Chronic   | BdF                                    | Tracking figure-8                      |                                        |                         |                                              |          |                               |                     |                         |                      | ③    |                         |                           |                                                             |          |  |  |
| Dukelow [58] 2010            | 45           | Sub-acute | KINARM                                 | Bimanual matching                      |                                        |                         |                                              |          |                               |                     |                         |                      |      |                         |                           | ②<br>② ②                                                    |          |  |  |
| Coderre [18] 2010            | 52           | Sub-acute | KINARM                                 | CO-PTP                                 |                                        |                         |                                              |          |                               |                     |                         |                      |      | ②                       |                           | ② ②                                                         |          |  |  |
| Conroy [51] 2011             | 62           | Chronic   | InMotion2<br>InMotion (Linear)         | • CO-PTP<br>• Multi-level reaching     |                                        |                         |                                              |          |                               |                     |                         |                      |      |                         |                           | ③<br>③ ③                                                    |          |  |  |
| Mazzoleni [52] 2011          | 17           | Chronic   | InMotion2                              | CO-PTP                                 |                                        |                         |                                              |          |                               |                     |                         |                      |      |                         |                           | ③<br>③ ③                                                    |          |  |  |
| Zollo [10] 2011              | 24           | Chronic   | InMotion2<br>InMotion3                 | Unperturbed & resistive point-to-point |                                        |                         |                                              |          |                               |                     |                         |                      |      |                         |                           | ③*<br>③<br>③ ③<br>③<br>③ ③<br>③                             |          |  |  |
| Squeri [57] 2011             | 1            | Chronic   | BdF                                    | CO-PTP                                 |                                        |                         |                                              |          |                               |                     |                         |                      |      |                         |                           | ③<br>③ ③                                                    |          |  |  |
| Abdullah [70] 2011           | 8            | Sub-acute | Uni of Guelph Therapeutic Robotic Sys. | Shape tracing                          |                                        |                         |                                              |          |                               |                     |                         |                      |      |                         |                           | ②                                                           |          |  |  |
| Johnson [11] 2011            | 7            | Chronic   | BiAS-ADLER                             | Drink                                  |                                        |                         |                                              |          |                               |                     |                         |                      |      |                         |                           | ③ ③<br>③                                                    |          |  |  |
|                              |              |           |                                        | Pour                                   |                                        |                         |                                              |          |                               |                     |                         |                      |      |                         |                           |                                                             | ③ ③<br>③ |  |  |

$\dot{x}, \dot{\theta}$  : Speed metric

$\ddot{x}, \ddot{\theta}$  : Acceleration metric

$\overset{\cdot}{\ddot{x}}, \overset{\cdot}{\ddot{\theta}}$  : Jerk metric

-sub: sub-movement metric

① significant improvement in acute patients (P<0.05)

② significant improvement in sub-acute patients (P<0.05)

③ significant improvement in chronic patients (P<0.05)

① insignificant improvement in acute patients (P>0.05)

② insignificant improvement in sub-acute patients (P>0.05)

③ insignificant improvement in chronic patients (P>0.05)

All the indicator has asterisk (\*) if the parameter used is reported to have strong correlation to any standard clinical scales.

Multiple symbols of different type in one category indicates different stages evaluated, multiple symbols of the same type in the same category indicates more than 1 parameter used to define the characteristic

| First Author, Year published | Subjects (n) | Phase            | Rehabilitation Robot | Evaluation activity                    | Loss of somatosensation (feed-forward) |                         | Paresis & Loss of somatosensation (feedback) |          | Loss of fractionated movement |                     |                         | Abnormal muscle tone |      |                         |                           |                                                         |        |
|------------------------------|--------------|------------------|----------------------|----------------------------------------|----------------------------------------|-------------------------|----------------------------------------------|----------|-------------------------------|---------------------|-------------------------|----------------------|------|-------------------------|---------------------------|---------------------------------------------------------|--------|
|                              |              |                  |                      |                                        | Plan                                   | Inter-limb coordination | Temporal efficiency                          | Accuracy | Efficacy                      | Movement Efficiency | Intra-limb coordination | Range (ROM)          | Ease | Smoothness              |                           |                                                         |        |
|                              |              |                  |                      |                                        |                                        |                         |                                              |          |                               |                     |                         |                      |      | $\dot{x}, \dot{\theta}$ | $\ddot{x}, \ddot{\theta}$ | $\overset{\cdot\cdot}{x}, \overset{\cdot\cdot}{\theta}$ | -sub   |
| Mazzoleni [59] 2012          | 11           | Chronic          | InMotion2            | CO-PTP                                 |                                        |                         |                                              |          |                               |                     |                         | ③                    | ③    |                         |                           |                                                         |        |
| Panarese [67] 2012           | 18           | Chronic          | MEMOS                | Square and Diamond path PTP            |                                        |                         |                                              | ③        | ③                             |                     |                         |                      | ③    | ③                       |                           |                                                         |        |
| Dukelow [20] 2012            | 100          | Sub-acute        | KINARM               | Bimanual matching                      |                                        |                         |                                              |          |                               |                     |                         |                      |      |                         |                           |                                                         |        |
|                              |              |                  |                      | CO-PTP                                 | ②<br>② ②                               |                         | ②                                            |          |                               |                     |                         |                      |      |                         |                           | ②                                                       |        |
| Frisoli [64] 2012            | 7            | Chronic          | L-Exos               | Sagittal CO-PTP                        |                                        |                         |                                              | ③        |                               |                     |                         |                      |      |                         |                           |                                                         | ③*     |
| Frisoli [61] 2012            | 8            | Chronic          | L-Exos               | Sagittal CO-PTP                        |                                        |                         |                                              | ③        |                               |                     |                         |                      |      |                         |                           |                                                         | ③*     |
| Mazzoleni [53] 2013          | 50           | Sub-acute (n=25) | InMotion3            | CO-PTP                                 | ②                                      |                         |                                              |          |                               |                     |                         |                      |      |                         |                           |                                                         |        |
|                              |              | Chronic (n=25)   |                      |                                        | ③                                      |                         |                                              |          |                               |                     |                         |                      |      | ② ③                     |                           | ② ③<br>② ③                                              | ②<br>③ |
| Wu [15] 2013                 | 53           | Chronic          | Bi-ManuTrack         | Reach and press                        |                                        |                         |                                              | ③        |                               |                     |                         |                      |      |                         |                           |                                                         | ③      |
| Simkins [89] 2013            | 15           | Chronic          | EXO-UL7              | Constrained reaching, Pong-style games |                                        |                         |                                              |          |                               |                     |                         |                      |      |                         |                           |                                                         | ③      |
| Semrau [19] 2013             | 113          | Chronic          | KINARM               | Bimanual matching                      | ③*<br>③*                               |                         |                                              |          |                               |                     |                         |                      |      |                         |                           |                                                         | ③      |

$\dot{x}, \dot{\theta}$  : Speed metric       $\ddot{x}, \ddot{\theta}$  : Acceleration metric       $\overset{\cdot\cdot}{x}, \overset{\cdot\cdot}{\theta}$  : Jerk metric      -sub: sub-movement metric  
 ① significant improvement in acute patients (P<0.05)      ② significant improvement in sub-acute patients (P<0.05)      ③ significant improvement in chronic patients (P<0.05)  
 ① insignificant improvement in acute patients (P>0.05)      ② insignificant improvement in sub-acute patients (P>0.05)      ③ insignificant improvement in chronic patients (P>0.05)  
**All the indicator has asterisk (\*) if the parameter used is reported to have strong correlation to any standard clinical scales.**  
**Multiple symbols of different type in one category indicates different stages evaluated, multiple symbols of the same type in the same category indicates more than 1 parameter used to define the characteristic**
